Table S1. Descriptive statistics of biochemical variables collected. Units of measurements: protein carbonyls as nmol mg<sup>-1</sup> protein; uric acid as mg dl<sup>-1</sup> of plasma; carotenoids as µg ml<sup>-1</sup> of plasma; thiols as µmol l<sup>-1</sup> of -SH groups; hydroperoxides as mmol l<sup>-1</sup> of H<sub>2</sub>O<sub>2</sub> equivalents; glutathione peroxidase as Units l<sup>-1</sup> of haemolysate; superoxide dismutase as U ml<sup>-1</sup> of haemolysate; catalase as U ml<sup>-1</sup> of haemolysate.

|                | Pre-Treatment value<br>mean | Pre-Treatment value<br>standard error | Post-Treatment value<br>mean | Post-Treatment value<br>standard error |
|----------------|-----------------------------|---------------------------------------|------------------------------|----------------------------------------|
|                | Protein carbonyls           | Protein carbonyls                     | Protein carbonyls            | Protein carbonyls                      |
| Control Flight | 6.88                        | 0.67                                  | 6.88                         | 0.76                                   |
| Mild Flight    | 8.25                        | 1.00                                  | 7.94                         | 1.26                                   |
| High Flight    | 7.66                        | 0.75                                  | 10.53                        | 0.92                                   |
|                | Uric acid                   | Uric acid                             | Uric acid                    | Uric acid                              |
| Control Flight | 12.85                       | 0.67                                  | 9.01                         | 0.44                                   |
| Mild Flight    | 13.16                       | 0.72                                  | 10.90                        | 0.72                                   |
| High Flight    | 12.40                       | 0.64                                  | 11.73                        | 0.68                                   |
|                | Carotenoids                 | Carotenoids                           | Carotenoids                  | Carotenoids                            |
| Control Flight | 32.17                       | 1.94                                  | 30.31                        | 1.64                                   |
| Mild Flight    | 29.62                       | 2.04                                  | 28.05                        | 1.80                                   |
| High Flight    | 31.97                       | 2.42                                  | 30.03                        | 2.29                                   |
|                | Thiols                      | Thiols                                | Thiols                       | Thiols                                 |
| Control Flight | 20888.50                    | 803.94                                | 20525.79                     | 884.79                                 |
| Mild Flight    | 22014.07                    | 995.83                                | 21571.77                     | 808.05                                 |
| High Flight    | 24022.20                    | 951.26                                | 20453.60                     | 832.13                                 |
|                | Hydroperoxides              | Hydroperoxides                        | Hydroperoxides               | Hydroperoxides                         |
| Control Flight | 0.53                        | 0.03                                  | 0.64                         | 0.05                                   |
| Mild Flight    | 0.50                        | 0.03                                  | 0.66                         | 0.05                                   |
| High Flight    | 0.48                        | 0.04                                  | 0.65                         | 0.05                                   |
|                | Glutathione peroxidase      | Glutathione peroxidase                | Glutathione peroxidase       | Glutathione peroxidase                 |
| Control Flight | 1447.50                     | 50.23                                 | 1551.45                      | 52.31                                  |
| Mild Flight    | 1517.38                     | 54.92                                 | 1567.06                      | 58.70                                  |
| High Flight    | 1543.89                     | 46.33                                 | 1554.25                      | 46.18                                  |
|                | Superoxide dismutase        | Superoxide dismutase                  | Superoxide dismutase         | Superoxide dismutase                   |
| Control Flight | 445.28                      | 12.23                                 | 429.93                       | 13.47                                  |
| Mild Flight    | 447.06                      | 14.01                                 | 442.74                       | 12.47                                  |
| High Flight    | 426.91                      | 11.09                                 | 411.79                       | 14.16                                  |
|                | Catalase                    | Catalase                              | Catalase                     | Catalase                               |
| Control Flight | 429.10                      | 60.04                                 | 410.61                       | 56.10                                  |
| Mild Flight    | 483.50                      | 55.98                                 | 456.15                       | 51.07                                  |
| High Flight    | 417.39                      | 32.41                                 | 413.33                       | 39.96                                  |
